# Supplementary material for: Characterizing the molecular composition and diagnostic potential of Mycobacterium tuberculosis urinary cell-free DNA using next-generation sequencing
Source: PubMed Central journal article supplement (PMC8627387; doi:10.1016/j.ijid.2021.09.042), 2021-11
Supplement: mmc3.pdf [file mmc3.pdf]

## TB-positive

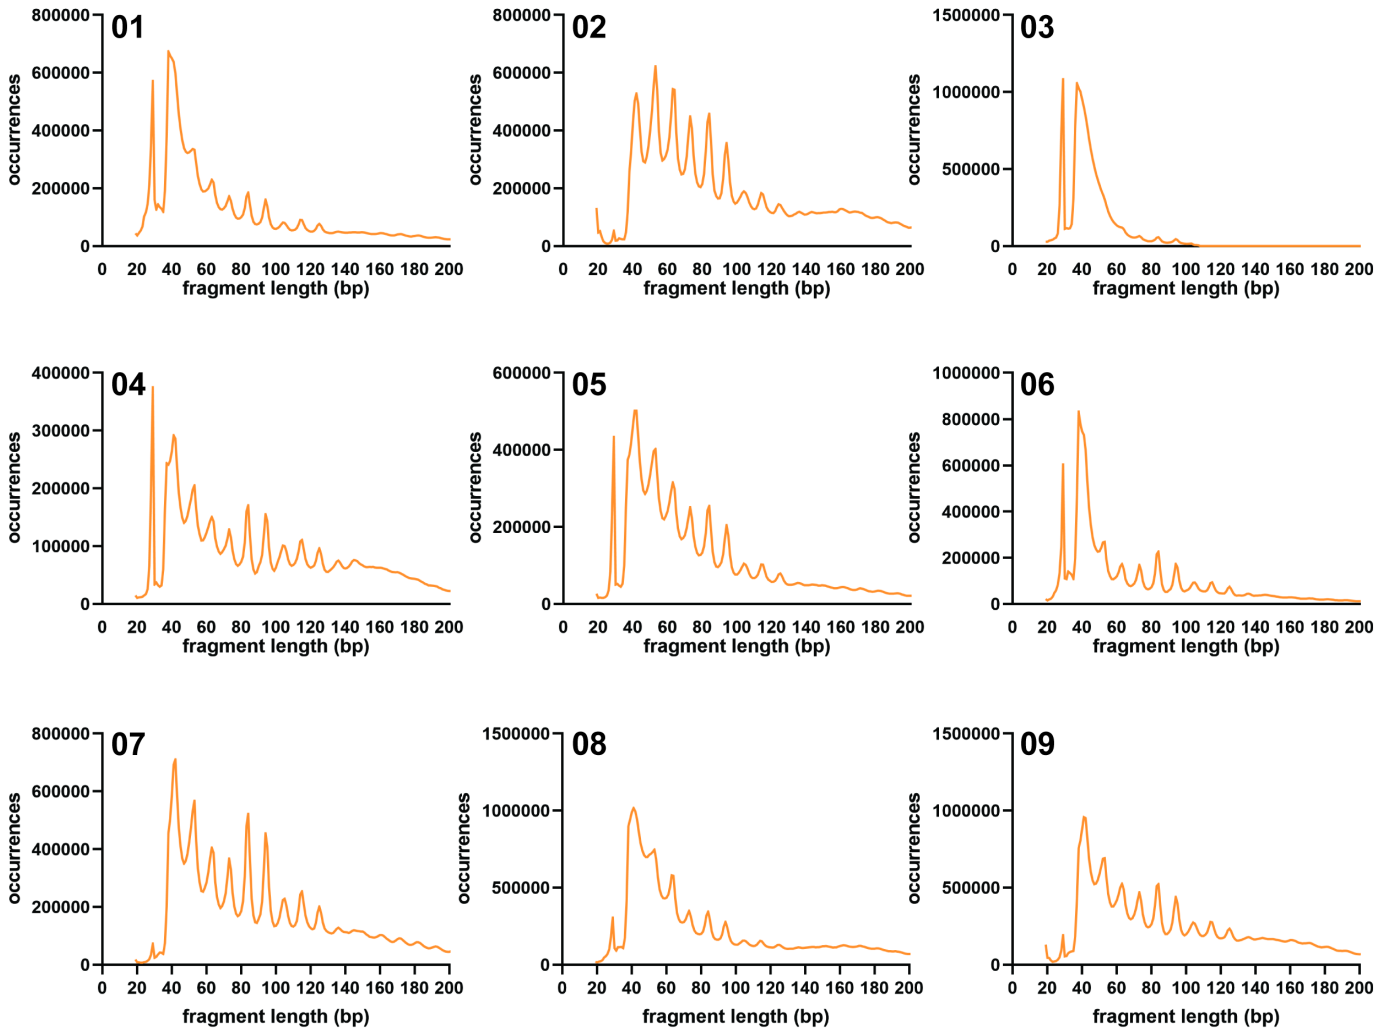

## TB-negative

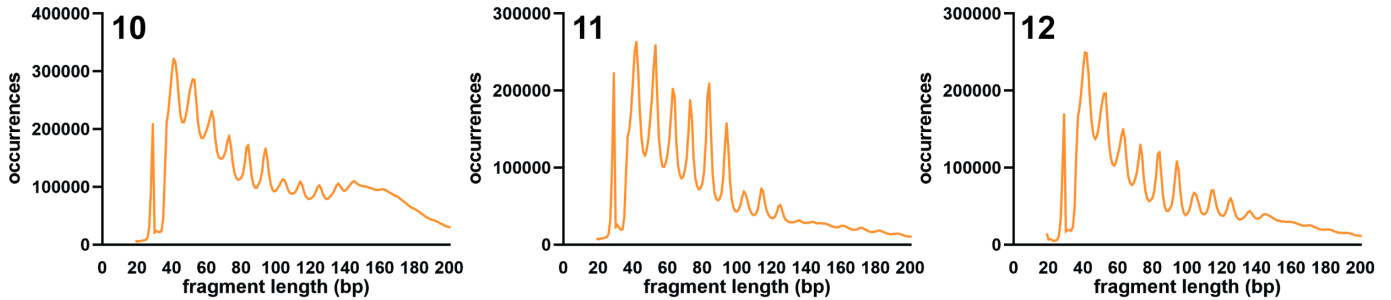

Supplemental Fig. S1: Fragment length distribution of cfDNA mapped to the human genome in each sample.
