# Supplementary material for: Characterizing the molecular composition and diagnostic potential of Mycobacterium tuberculosis urinary cell-free DNA using next-generation sequencing
Source: PubMed Central journal article supplement (PMC8627387; doi:10.1016/j.ijid.2021.09.042), 2021-11
Supplement: mmc4.pdf [file mmc4.pdf]

## TB-positive

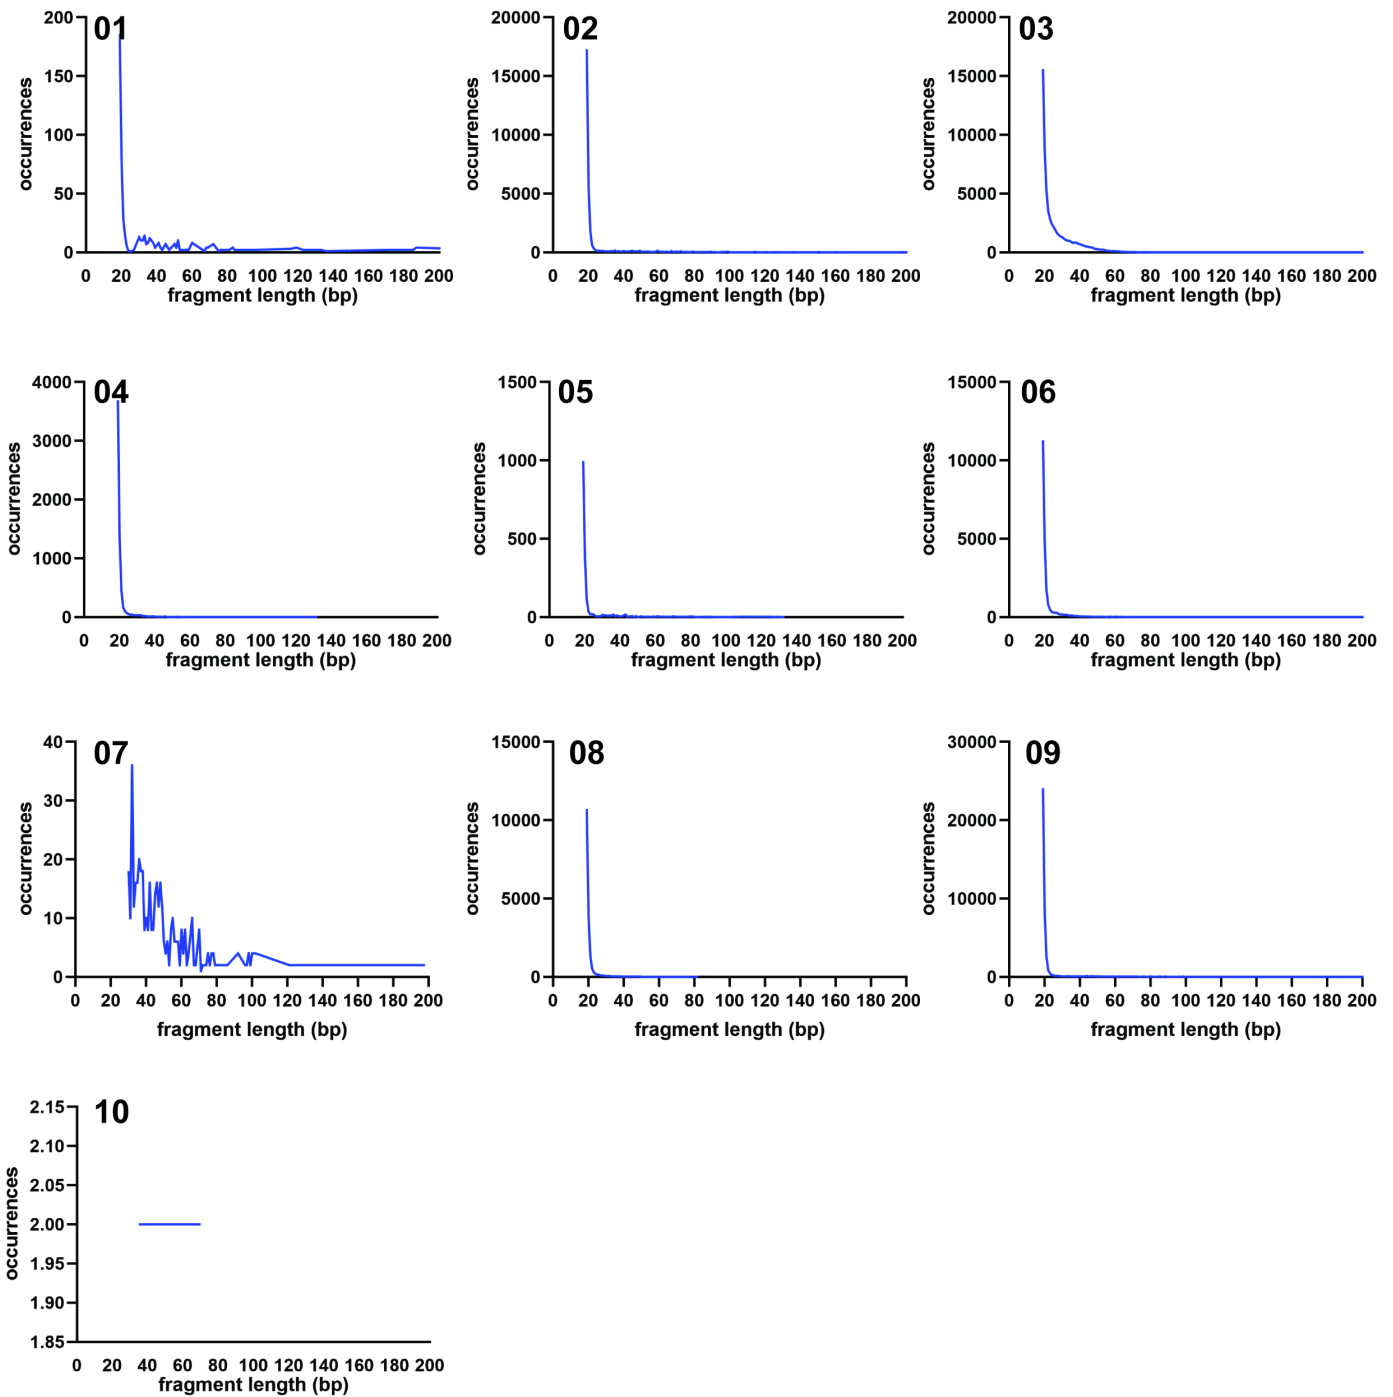

**Supplemental Fig. S2: Fragment length distribution of cfDNA mapped to the TB genome in each sample.** Sample 10 had a low number of reads that mapped to the TB genome, but was confirmed to contain reads specific to TB by metagenomic classification. Neither TB-negative sample (Sample 11 or Sample 12, excluded here) contained reads specific to TB by metagenomic classification.
